# Supplementary material
Source: Springer Nature journal article supplement (https://www.springermedizin.de/resource/supplementary/12879_2013_3097_MOESM3_ESM.pdf/9446002)

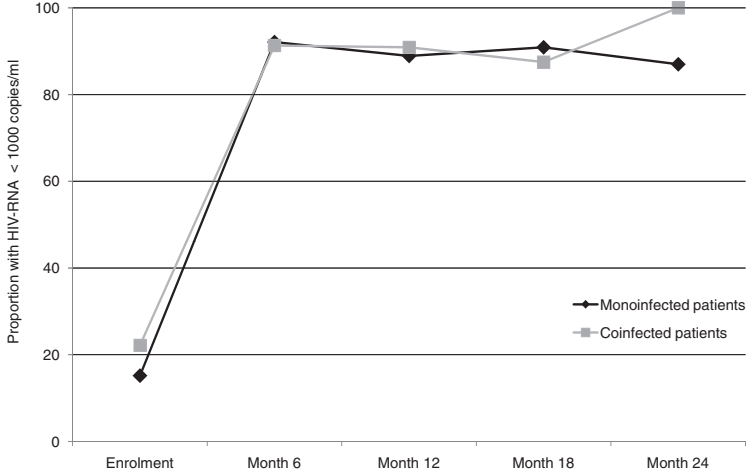

|             |    |     |     |     |    |     |
|-------------|----|-----|-----|-----|----|-----|
| HIV+ only   | N. | 277 | 214 | 108 | 88 | 100 |
| Coinfecting | N. | 27  | 23  | 11  | 8  | 10  |

Supplement: MOESM3 [file 9446002]
